# Supplementary material for: Structural dynamics of PtSn/SiO2 for propane dehydrogenation
Source: Royal Society of Chemistry journal article supplement (doi:10.1039/d4cy00725e), 2024-01-01
Supplement: d4cy00725e1.pdf [file d4cy00725e1.pdf]

## Supporting Information

### Structural Dynamics of PtSn/SiO<sub>2</sub> for Propane Dehydrogenation

Kewei Yu<sup>a,b</sup>, Matthew Scarpelli<sup>a</sup>, Sagar Sourav<sup>a,b</sup>, Alfred Worrada<sup>a,b</sup>, J. Anibal Boscoboinik<sup>c</sup>, Lu Ma<sup>d</sup>,  
Steven N. Ehrlich<sup>d</sup>, Nebojsa Marinkovic<sup>d</sup>, Weiqing Zheng<sup>\*a,b</sup>, Dionisios G. Vlachos<sup>\*a,b</sup>

Department of Chemical and Biomolecular Engineering, University of Delaware, 150  
Academy St., Newark, DE, United States

Delaware Energy Institute, University of Delaware, 221 Academy St., Newark, DE, United  
States

Center for Functional Nanomaterials, Brookhaven National Laboratory, Upton, NY 11973,  
United States

National Synchrotron Light Source, Brookhaven National Laboratory, Upton, NY 11973,  
United States

\*Corresponding authors: [weiqing@udel.edu](mailto:weiqing@udel.edu), [vlachos@udel.edu](mailto:vlachos@udel.edu)

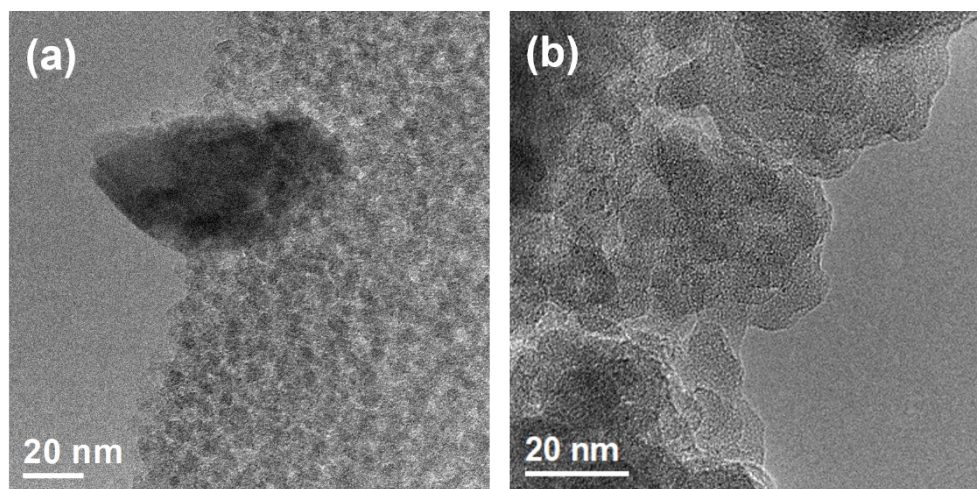

Figure S1. HRTEM images of Sn/SiO<sub>2</sub>. (a) HRTEM of Sn/SiO<sub>2</sub>-500C; (b) HRTEM of Sn/SiO<sub>2</sub>-500C-600R.

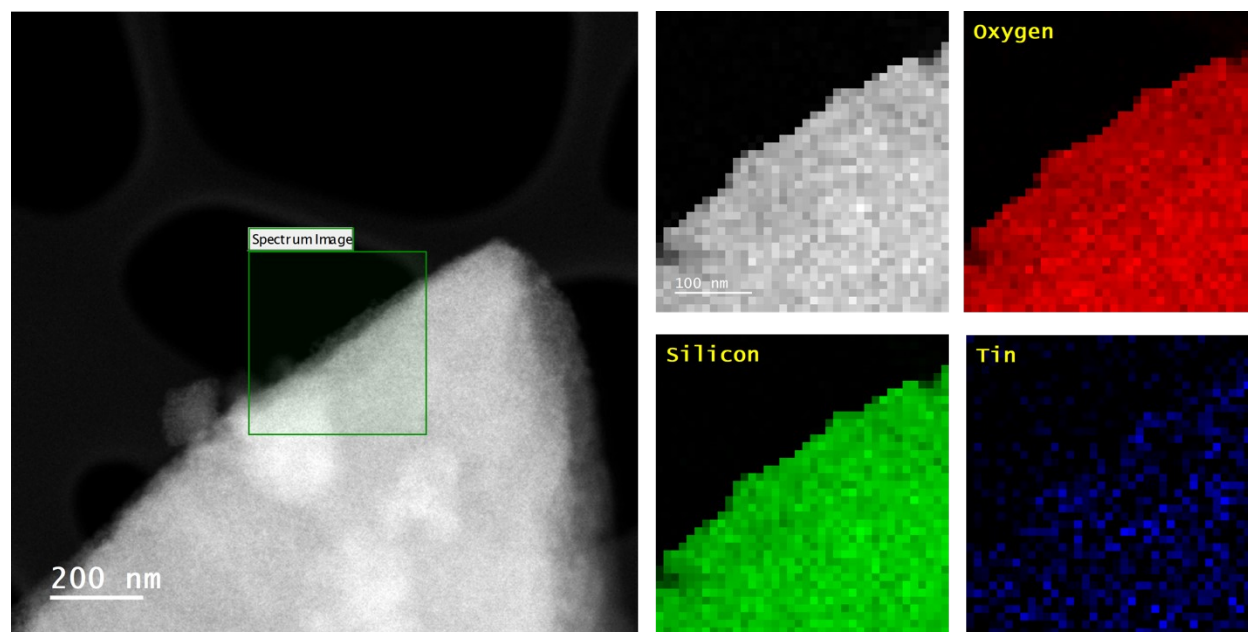

*Figure S2. EDS mapping images of Sn/SiO<sub>2</sub>. Sn species are uniformly distributed on the SiO<sub>2</sub> support.*

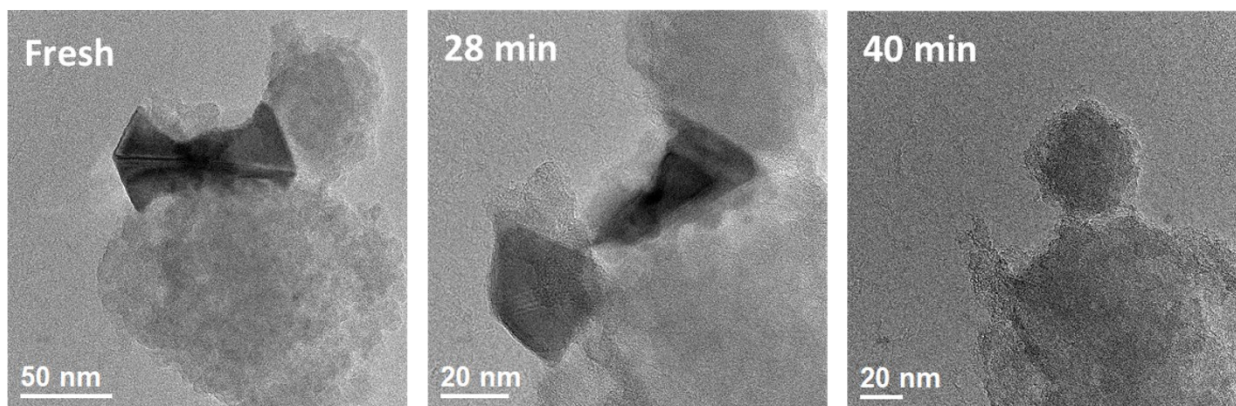

*Figure S3. In situ heating HRTEM images of Sn/SiO<sub>2</sub> in vacuum at 600 °C. Images are from a sample region with a large SnO<sub>2</sub> cluster, after the indicated duration of heating time. The SnO<sub>2</sub> cluster (a darker region in the first image) disappeared after heating for 40 min. Electrons from the TEM act as the reducing agent.*

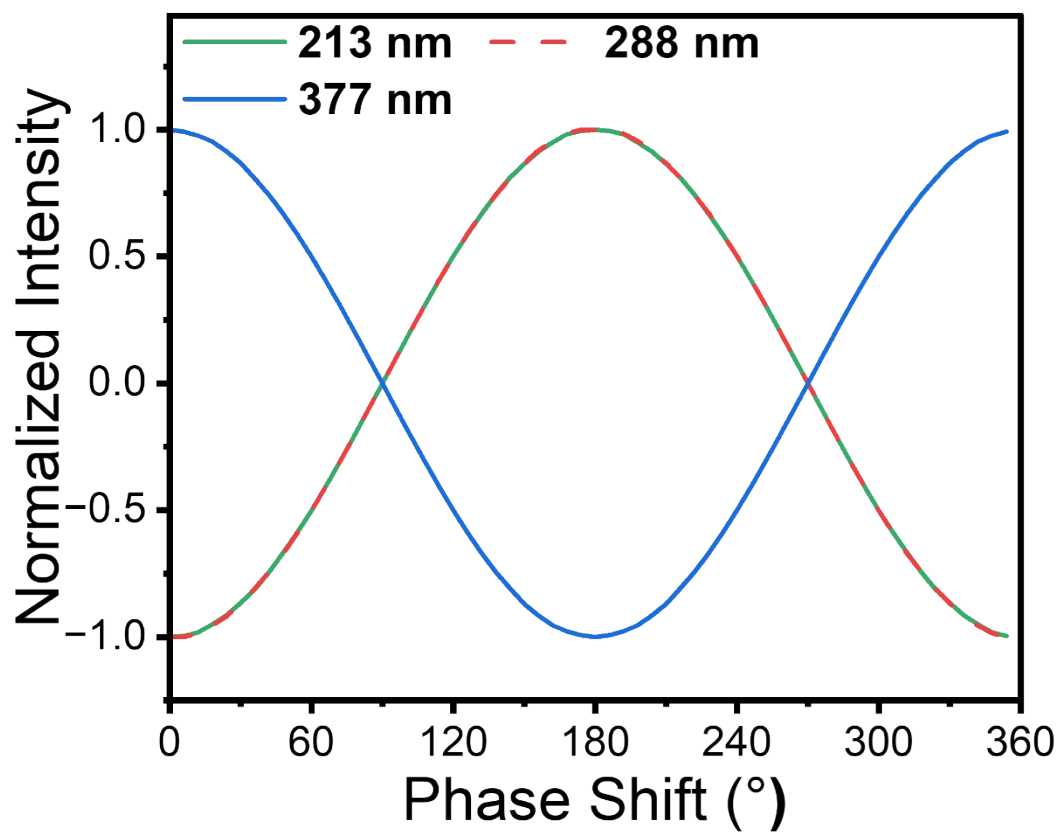

Figure S4. *Phase plot for MES-UV-vis spectra. Same phase for 213 nm and 288 nm bands, which are in opposite phase with 377 nm band.*

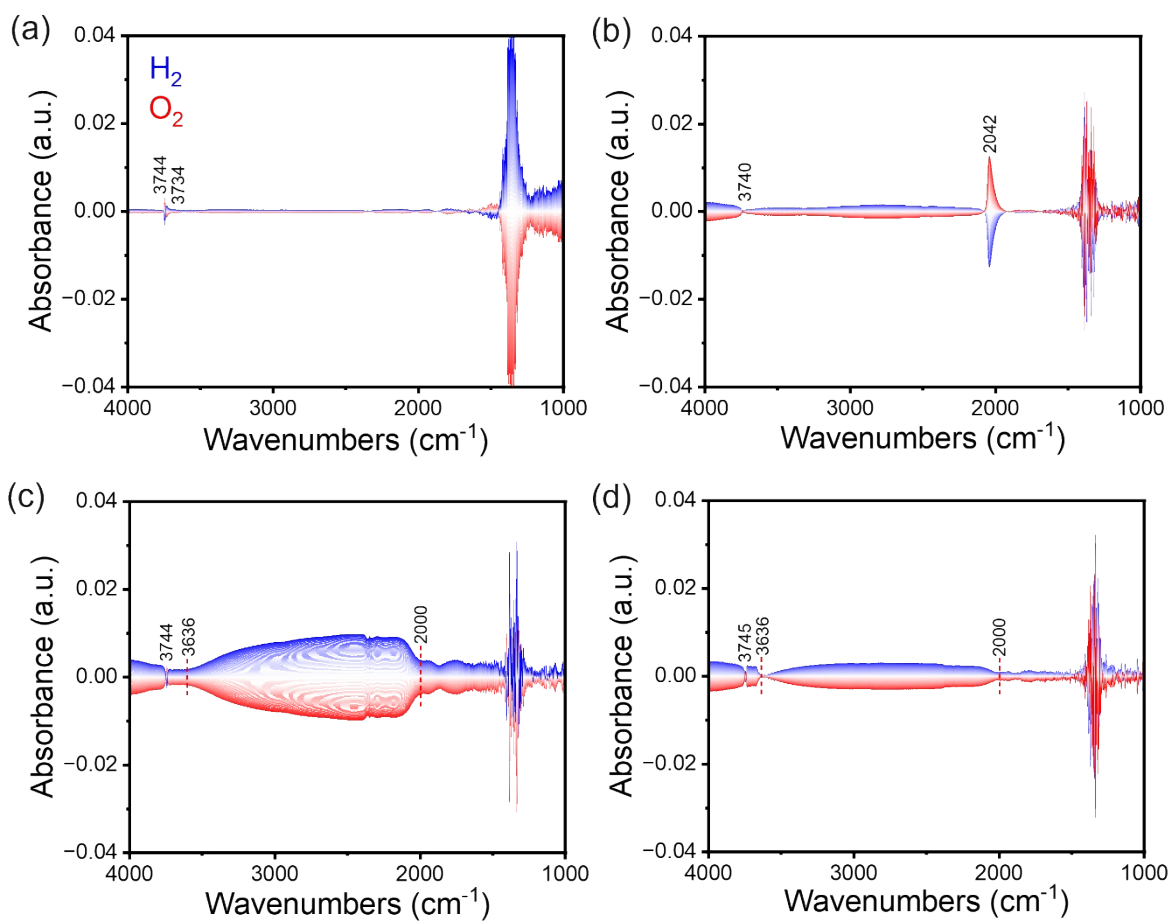

Figure S5. Phase domain MES-DRIFTS-FTIR in full range for: (a)  $\text{SiO}_2$ ; (b)  $\text{Pt}/\text{SiO}_2$ ; (c)  $\text{Sn}/\text{SiO}_2$ ; and (d)  $1\text{Pt}3\text{Sn}/\text{SiO}_2\text{-seq}$ . Gas feed:  $10\% \text{O}_2/\text{Ar}$  or  $10\% \text{H}_2/\text{Ar}$ , total  $50 \text{ sccm}$  gas flow. Modulation frequency =  $1/120 \text{ Hz}$  (period =  $120 \text{ s}$ ). Temperature =  $400 \text{ }^\circ\text{C}$ .



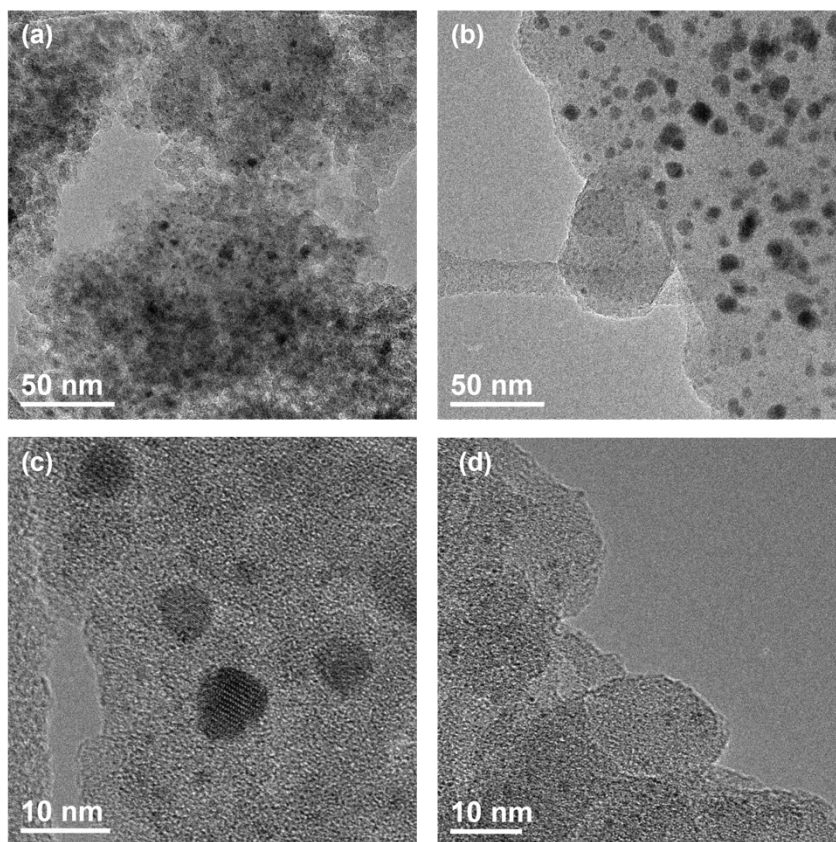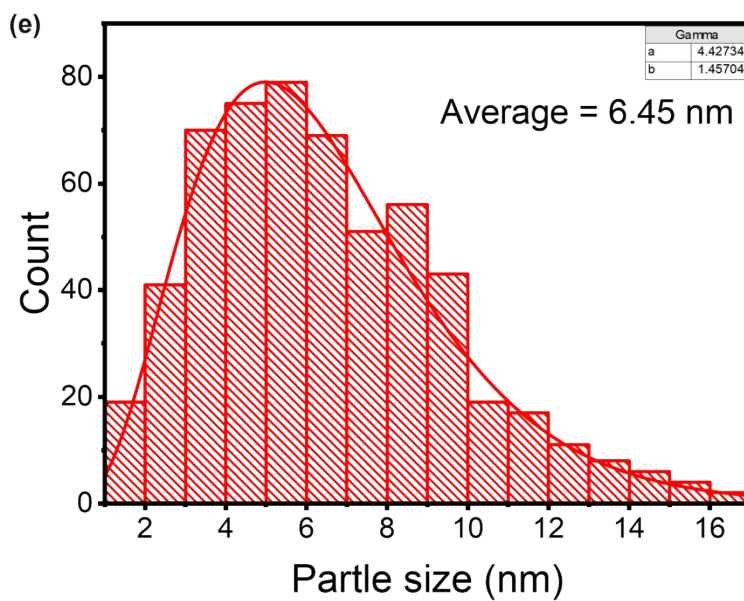

Figure S6. HRTEM images of 1Pt2Sn/SiO<sub>2</sub>-co. (a)-(d) TEM images. (e) Particle size distribution. Images indicate a wide particle size distribution, ranging from subnanometer clusters to particles larger than 10 nm.

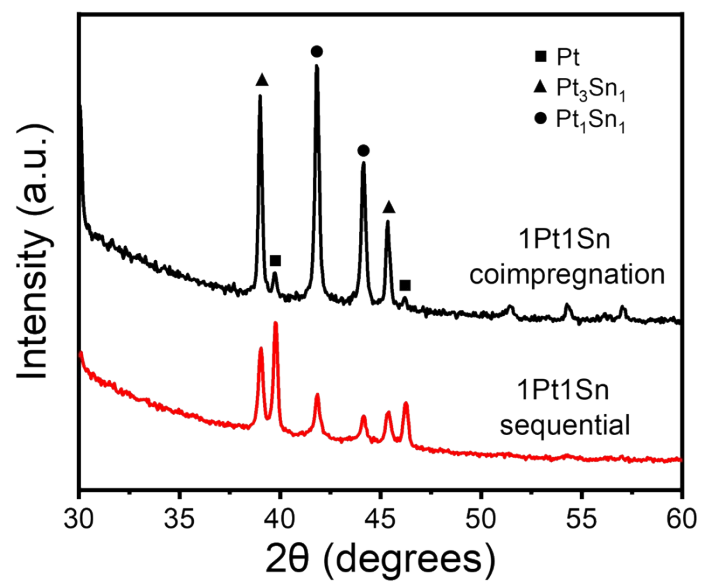

Figure S7. XRD of PtSn/SiO<sub>2</sub> catalysts synthesized through calcination-reduction. 500 °C calcination in air, 600 °C reduction in 10% H<sub>2</sub>.

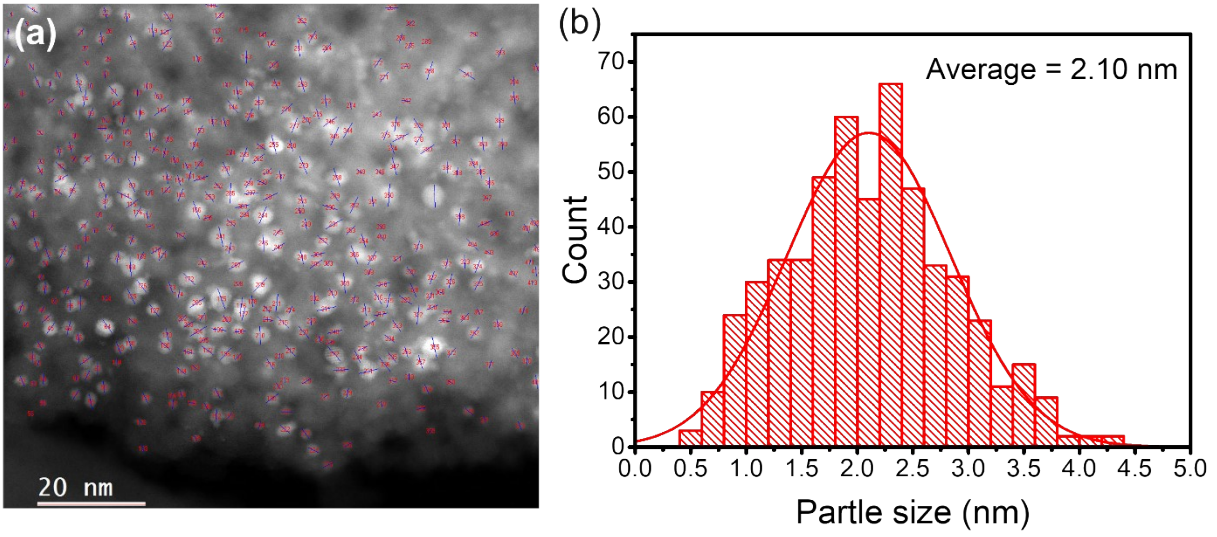

Figure S8. HAADF-STEM imaging of 1Pt3Sn/SiO<sub>2</sub>-seq. (a) STEM image; (b) particle size distribution and average particle size.



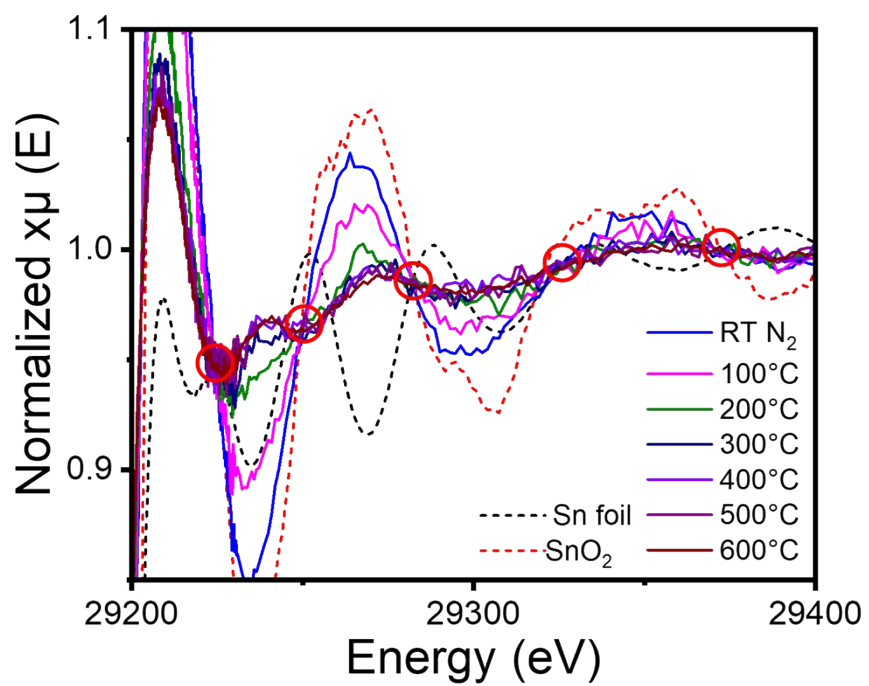

Figure S9. Sn K-edge XANES spectra of 1Pt3Sn/SiO<sub>2</sub>-seq (zoom in view). Isosbestic points indicated by the circles.

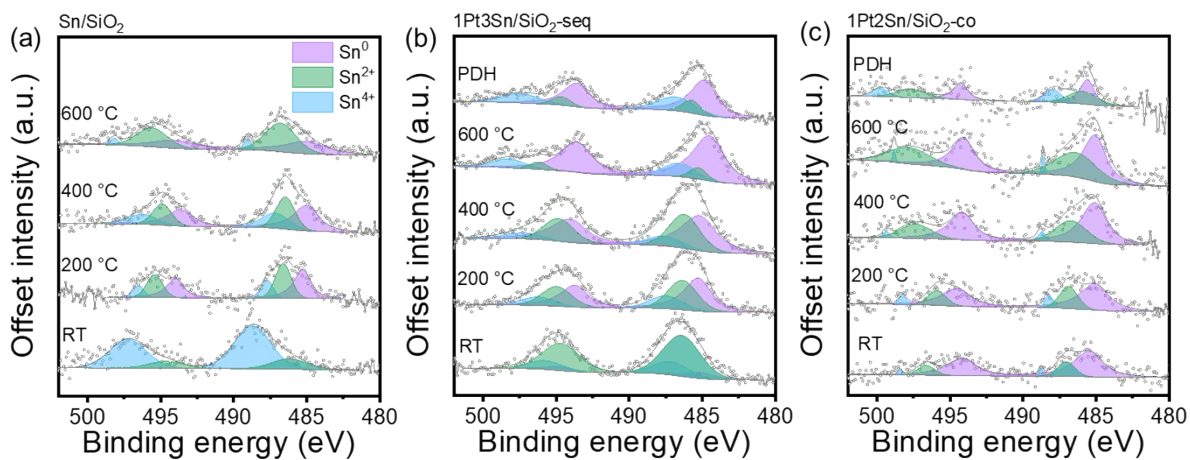

Figure S10. **NAP-XPS Sn 3d spectra.** (a) Sn/SiO<sub>2</sub>; (b) 1Pt3Sn/SiO<sub>2</sub>-seq; (c) 1Pt2Sn/SiO<sub>2</sub>-co. Spectra taken during reduction at indicated temperatures in 1 mbar H<sub>2</sub>. PDH spectra taken in 1 mbar C<sub>3</sub>H<sub>8</sub> at 600 °C.

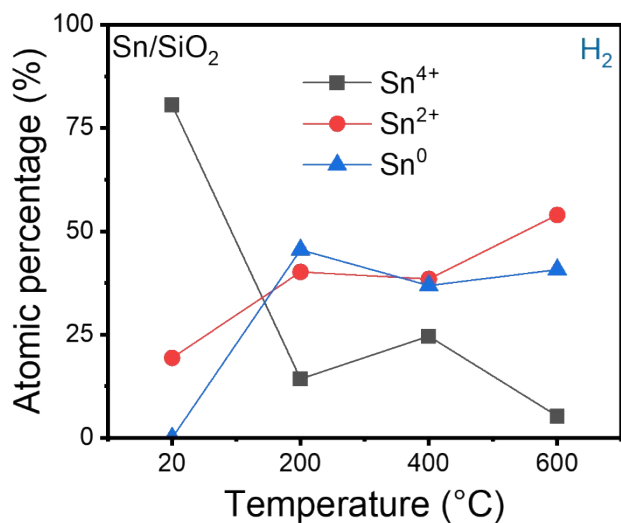

Figure S11. **NAP-XPS surface Sn oxidation states composition evolution with temperature of Sn/SiO<sub>2</sub>.**

Table S1. NAP-XPS surface Sn oxidation state percentage. (a) 1Pt3Sn/SiO<sub>2</sub>-seq; (b) Sn/SiO<sub>2</sub>; (c) 1Pt2Sn/SiO<sub>2</sub>-co. Measurement conducted 1 mbar H<sub>2</sub> or C<sub>3</sub>H<sub>8</sub> at indicated temperatures.

|                                                                          | Sn <sup>4+</sup> (%) | Sn <sup>2+</sup> (%) | Sn <sup>0</sup> (%) |
|--------------------------------------------------------------------------|----------------------|----------------------|---------------------|
| 1Pt3Sn/SiO <sub>2</sub> -seq 1 mbar H <sub>2</sub> 20 °C                 | 21.021               | 69.20615             | 9.77285             |
| 1Pt3Sn/SiO <sub>2</sub> -seq 1 mbar H <sub>2</sub> 200 °C                | 17.55581             | 35.61                | 46.8342             |
| 1Pt3Sn/SiO <sub>2</sub> -seq 1 mbar H <sub>2</sub> 400 °C                | 11.54706             | 35.14118             | 53.31176            |
| 1Pt3Sn/SiO <sub>2</sub> -seq 1 mbar H <sub>2</sub> 600 °C                | 17.71299             | 7.93077              | 74.35625            |
| 1Pt3Sn/SiO <sub>2</sub> -seq 1 mbar C <sub>3</sub> H <sub>8</sub> 600 °C | 27.07032             | 12.14468             | 60.785              |
| Sn/SiO <sub>2</sub> 1 mbar H <sub>2</sub> RT                             | 80.60708             | 19.39292             | 0                   |
| Sn/SiO <sub>2</sub> 1 mbar H <sub>2</sub> 200 °C                         | 14.25745             | 40.19437             | 45.54818            |
| Sn/SiO <sub>2</sub> 1 mbar H <sub>2</sub> 400 °C                         | 24.60946             | 38.48766             | 36.90288            |
| Sn/SiO <sub>2</sub> 1 mbar H <sub>2</sub> 600 °C                         | 5.2814               | 53.9833              | 40.73531            |
| 1Pt2Sn/SiO <sub>2</sub> -co 1 mbar H <sub>2</sub> 20 °C                  | 2.42285              | 20.34371             | 77.23343            |
| 1Pt2Sn/SiO <sub>2</sub> -co 1 mbar H <sub>2</sub> 200 °C                 | 6.47813              | 27.19262             | 66.32925            |
| 1Pt2Sn/SiO <sub>2</sub> -co 1 mbar H <sub>2</sub> 400 °C                 | 3.27675              | 32.7611              | 63.96215            |
| 1Pt2Sn/SiO <sub>2</sub> -co 1 mbar H <sub>2</sub> 600 °C                 | 2.01534              | 41.82163             | 56.16304            |



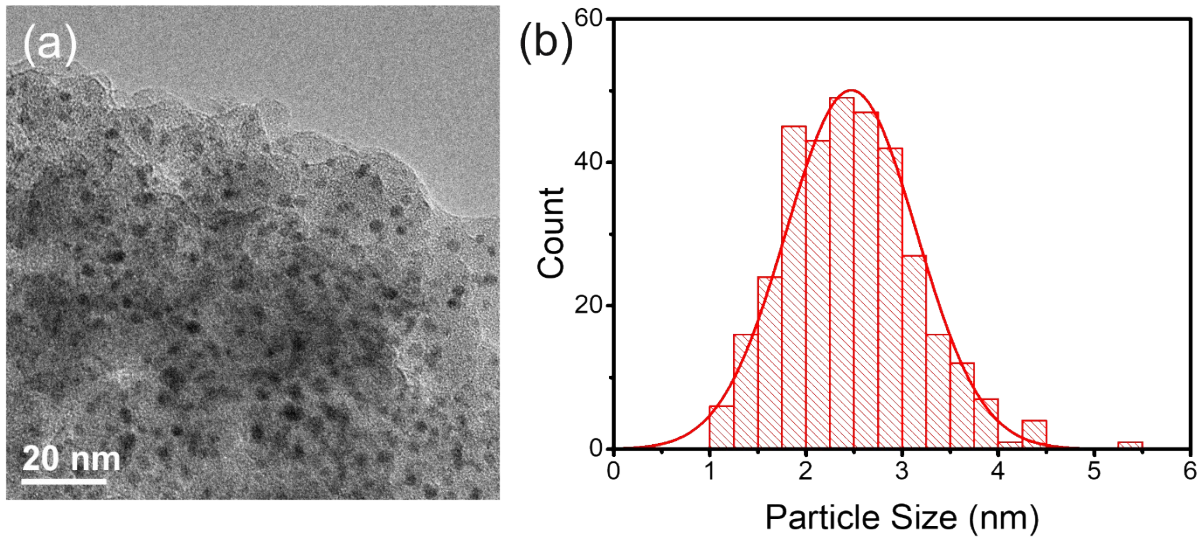

Figure S12. HRTEM of Pt/SiO<sub>2</sub>. (a) HRTEM image; (b) Particle size distribution. Average size is 2.47 nm.

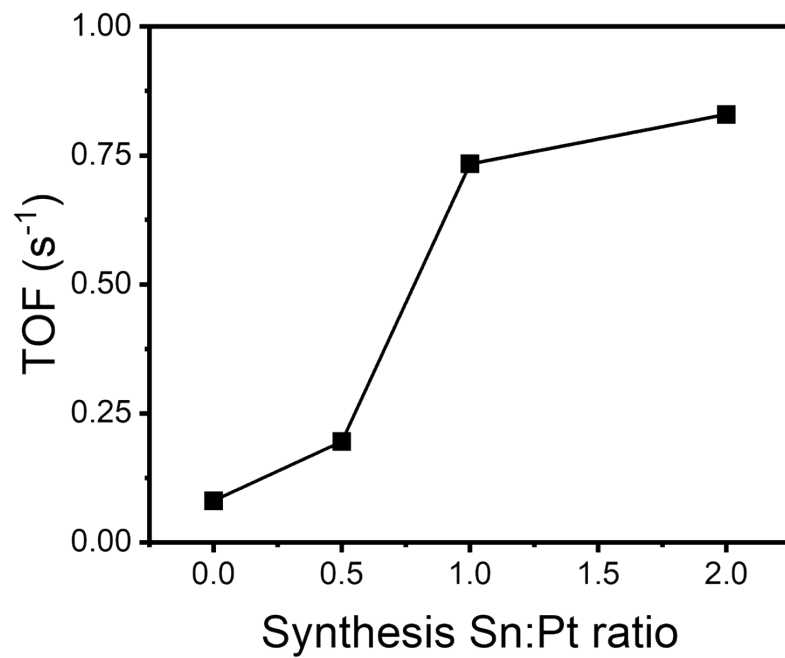

Figure S13. **TOF vs. synthesis Sn:Pt ratio for PtSn/SiO<sub>2</sub>-co.** Site densities are estimated based on the CO chemisorption result of Pt/SiO<sub>2</sub> and CO DRIFTS results of Sn-containing samples. PDH reaction rates are based on the initial conversion in the time on stream result in Figure 7.
